# Supplementary material for: Brugia malayi Excreted/Secreted Proteins at the Host/Parasite Interface: Stage- and Gender-Specific Proteomic Profiling
Source: PLoS Negl Trop Dis. 2009 Apr 7;3(4):e410. doi: 10.1371/journal.pntd.0000410 (PMC2659452; doi:10.1371/journal.pntd.0000410)
Supplement: Table S7 — Wolbachia ES. List of proteins in the secretome being identified as Wolbachia in origin. (0.05 MB XLS) [file pntd.0000410.s008.xls]

## Sheet: Table S7 - Wolbachial Proteins
Table S7- Brugia malayi Secretome - Wolbachial Proteins
Best match to WBM-PEP database	Sequence Name	E value	Protein	Reference	AFES	AMES	MFES
gi|58584688	Q5GSK5	1E-169	DNA-directed RNA polymerase sigma 32 subunit, RpoH subfamily - Wolbachia sp. subsp. Brugia malayi (strain TRS)	Q5GSK5_WOLTR	1	3	1
gi|58584704	Q5GSI9	0.0	Ankyrin repeat-containing protein and possible domain WF-3 - Wolbachia sp. subsp. Brugia malayi (strain TRS)	Q5GSI9_WOLTR	1	-	1
gi|58584650	Q5GSP3	0.0	DNA-directed RNA polymerase sigma 70 subunit, RpoD - Wolbachia sp. subsp. Brugia malayi (strain TRS)	Q5GSP3_WOLTR	1	-	1
gi|58584516	Q5GT27	0.0	Ribonuclease D - Wolbachia sp. subsp. Brugia malayi (strain TRS)	Q5GT27_WOLTR	1	-	1
gi|58584411	Q5GTD2	0.0	Predicted ATPase of the PP-loop superfamily implicated in cell cycle control, MesJ - Wolbachia sp. subsp. Brugia malayi (strain TRS)	Q5GTD2_WOLTR	2	1	1
gi|58584794	Q5GS99	0.0	Translation initiation factor IF-2 - Wolbachia sp. subsp. Brugia malayi (strain TRS)	IF2_WOLTR	-	1	1
gi|58585007	Q5GRN6	0.0	Type IV secretory pathway, VirB4 components - Wolbachia sp. subsp. Brugia malayi (strain TRS)	Q5GRN6_WOLTR	-	1	1
gi|58584885	Q5GS08	0.0	Superfamily I DNA and RNA helicase, UvrD - Wolbachia sp. subsp. Brugia malayi (strain TRS)	Q5GS08_WOLTR	-	2	1
gi|58584873	Q5GS20	1E-033	50S ribosomal protein L32 - Wolbachia sp. subsp. Brugia malayi (strain TRS)	RL32_WOLTR	-	-	1
gi|58584759	Q5GSD4	1E-100	50S ribosomal protein L9 - Wolbachia sp. subsp. Brugia malayi (strain TRS)	RL9_WOLTR	-	-	1
gi|58584972	Q5GRS1	1E-137	ABC-type Zn2+ transport systems, ATPase component - Wolbachia sp. subsp. Brugia malayi (strain TRS)	Q5GRS1_WOLTR	-	-	1
gi|58584613	Q5GST0	1E-178	Acetylglutamate kinase - Wolbachia sp. subsp. Brugia malayi (strain TRS)	Q5GST0_WOLTR	-	-	1
gi|58584839	Q5GS54	0.0	Ankyrin repeat-containing protein - Wolbachia sp. subsp. Brugia malayi (strain TRS)	Q5GS54_WOLTR	-	-	1
gi|58584572	Q5GSX1	0.0	ATP synthase subunit alpha (EC 3.6.3.14) (ATPase subunit alpha) (ATP synthase F1 sector subunit alpha) - Wolbachia sp. subsp. Brugia malayi (strain TRS)	ATPA_WOLTR	-	-	1
gi|58584904	Q5GRY9	0.0	Bifunctional DNA-directed RNA polymerase, beta and beta' chain (EC 2.7.7.6) [Includes: DNA-directed RNA polymerase beta chain (Transcriptase beta chain) (RNA polymerase subunit beta); DNA-directed RNA polymerase beta' chain (Transcriptase beta' chain) (	RPOBC_WOLTR	-	-	1
gi|58584752	Q5GSE1	0.0	Chaperone protein dnaK (Heat shock protein 70) (Heat shock 70 kDa protein) (HSP70) - Wolbachia sp. subsp. Brugia malayi (strain TRS)	DNAK_WOLTR	-	-	1
gi|58584664	Q5GSM9	1E-146	Dimethyladenosine transferase (EC 2.1.1.-) (S-adenosylmethionine-6-N', N'-adenosyl(rRNA) dimethyltransferase) (16S rRNA dimethylase) (High level kasugamycin resistance protein ksgA) (Kasugamycin dimethyltransferase) - Wolbachia sp. subsp. Brugia malayi	KSGA_WOLTR	-	-	1
gi|58584968	Q5GRS5	0.0	DNA recombination protein rmuC homolog - Wolbachia sp. subsp. Brugia malayi (strain TRS)	Q5GRS5_WOLTR	-	-	1
gi|58584986	Q5GRQ7	1E-154	Exonuclease III - Wolbachia sp. subsp. Brugia malayi (strain TRS)	Q5GRQ7_WOLTR	-	-	1
gi|58584513	Q5GT30	0.0	Glutamine phosphoribosylpyrophosphate amidotransferase - Wolbachia sp. subsp. Brugia malayi (strain TRS)	Q5GT30_WOLTR	-	-	1
gi|58584268	Q5GTS5	1E-165	GTPase - Wolbachia sp. subsp. Brugia malayi (strain TRS)	Q5GTS5_WOLTR	-	-	1
gi|58584624	Q5GSR9	0.0	Isocitrate/isopropylmalate dehydrogenase, LeuB - Wolbachia sp. subsp. Brugia malayi (strain TRS)	Q5GSR9_WOLTR	-	-	1
gi|58584849	Q5GS44	0.0	Multisubunit Na+/H+ antiporter, MnhD subunit - Wolbachia sp. subsp. Brugia malayi (strain TRS)	Q5GS44_WOLTR	-	-	1
gi|58584805	Q5GS88	0.0	NAD-dependent DNA ligase, Lig - Wolbachia sp. subsp. Brugia malayi (strain TRS)	Q5GS88_WOLTR	-	-	1
gi|58584500	Q5GT43	3E-099	NADH:ubiquinone oxidoreductase chain B - Wolbachia sp. subsp. Brugia malayi (strain TRS)	Q5GT43_WOLTR	-	-	1
gi|58584312	Q5GTN1	0.0	NADPH-dependent glutamate synthase beta chain - Wolbachia sp. subsp. Brugia malayi (strain TRS)	Q5GTN1_WOLTR	-	-	1
gi|58584495	Q5GT48	1E-178	Nucleoside-diphosphate-sugar epimerase - Wolbachia sp. subsp. Brugia malayi (strain TRS)	Q5GT48_WOLTR	-	-	1
gi|58584314	Q5GTM9	1E-100	Outer membrane protein - Wolbachia sp. subsp. Brugia malayi (strain TRS)	Q5GTM9_WOLTR	-	-	1
gi|58584412	Q5GTD1	1E-090	Outer membrane protein, pal-like - Wolbachia sp. subsp. Brugia malayi (strain TRS)	Q5GTD1_WOLTR	-	-	1
gi|58584529	Q5GT14	0.0	Phosphoribosylformylglycinamidine (FGAM) synthase, synthetase domain - Wolbachia sp. subsp. Brugia malayi (strain TRS)	Q5GT14_WOLTR	-	-	1
gi|58585028	Q5GRL5	0.0	Predicted protein - Wolbachia sp. subsp. Brugia malayi (strain TRS)	Q5GRL5_WOLTR	-	-	1
gi|58584912	Q5GRY1	5E-089	Predicted protein - Wolbachia sp. subsp. Brugia malayi (strain TRS)	Q5GRY1_WOLTR	-	-	1
gi|58584370	Q5GTH3	1E-121	Predicted protein - Wolbachia sp. subsp. Brugia malayi (strain TRS)	Q5GTH3_WOLTR	-	-	1
gi|58584366	Q5GTH7	1E-036	Predicted protein - Wolbachia sp. subsp. Brugia malayi (strain TRS)	Q5GTH7_WOLTR	-	-	1
gi|58584352	Q5GTJ1	2E-041	Predicted protein - Wolbachia sp. subsp. Brugia malayi (strain TRS)	Q5GTJ1_WOLTR	-	-	1
gi|58584342	Q5GTK1	3E-035	Predicted protein - Wolbachia sp. subsp. Brugia malayi (strain TRS)	Q5GTK1_WOLTR	-	-	1
gi|58584308	Q5GTN5	1E-065	Predicted protein - Wolbachia sp. subsp. Brugia malayi (strain TRS)	Q5GTN5_WOLTR	-	-	1
gi|58584984	Q5GRQ9	0.0	Predicted Zn-dependent protease, TldD ortholog - Wolbachia sp. subsp. Brugia malayi (strain TRS)	Q5GRQ9_WOLTR	-	-	1
gi|58584796	Q5GS97	0.0	Proline dehydrogenase, P5C dehydrogenase, PutA ortholog - Wolbachia sp. subsp. Brugia malayi (strain TRS)	Q5GS97_WOLTR	-	-	1
gi|58584732	Q5GSG1	1E-144	Short-chain alcohol dehydrogenase family enzyme - Wolbachia sp. subsp. Brugia malayi (strain TRS)	Q5GSG1_WOLTR	-	-	1
gi|58584471	Q5GT72	4E-091	Single-stranded DNA-binding protein, ssb - Wolbachia sp. subsp. Brugia malayi (strain TRS)	Q5GT72_WOLTR	-	-	1
gi|58584965	Q5GRS8	0.0	Superfamily II DNA/RNA helicase - Wolbachia sp. subsp. Brugia malayi (strain TRS)	Q5GRS8_WOLTR	-	-	1
gi|58584539	Q5GT04	0.0	Type IV secretory pathway, VirB10 component - Wolbachia sp. subsp. Brugia malayi (strain TRS)	Q5GT04_WOLTR	-	-	1
gi|58584378	Q5GTG5	0.0	UDP-N-acetylmuramate--L-alanine ligase (EC 6.3.2.8) (UDP-N-acetylmuramoyl-L-alanine synthetase) - Wolbachia sp. subsp. Brugia malayi (strain TRS)	MURC_WOLTR	-	-	1
gi|58584799	Q5GS94	1E-121	Uncharacterized conserved protein related to eukaryotic translocase of inner mitochondrial membrane - Wolbachia sp. subsp. Brugia malayi (strain TRS)	Q5GS94_WOLTR	-	-	1
gi|58584903	Q5GRZ0	3E-081	Uncharacterized protein conserved in bacteria - Wolbachia sp. subsp. Brugia malayi (strain TRS)	Q5GRZ0_WOLTR	-	-	1
gi|58585061	Q5GRI2	1E-136	Undecaprenyl pyrophosphate synthase - Wolbachia sp. subsp. Brugia malayi (strain TRS)	Q5GRI2_WOLTR	-	-	1
gi|58584869	Q5GS24	0.0	Xaa-Pro aminopeptidase - Wolbachia sp. subsp. Brugia malayi (strain TRS)	Q5GS24_WOLTR	-	-	1
gi|58584465	Q5GT78	0.0	Arginyl-tRNA synthetase (EC 6.1.1.19) (Arginine--tRNA ligase) (ArgRS) - Wolbachia sp. subsp. Brugia malayi (strain TRS)	SYR_WOLTR	-	-	2
gi|58584432	Q5GTB1	0.0	ATP-dependent exoDNAse (Exonuclease V) beta subunit, RecB - Wolbachia sp. subsp. Brugia malayi (strain TRS)	Q5GTB1_WOLTR	-	-	2
gi|58584808	Q5GS85	0.0	ATP-dependent Lon protease - Wolbachia sp. subsp. Brugia malayi (strain TRS)	Q5GS85_WOLTR	-	-	2
gi|58584829	Q5GS64	3E-054	Bacterial nucleoid DNA-binding protein, HupA family - Wolbachia sp. subsp. Brugia malayi (strain TRS)	Q5GS64_WOLTR	-	-	2
gi|58584398	Q5GTE5	0.0	Chaperone protein htpG (Heat shock protein htpG) (High temperature protein G) - Wolbachia sp. subsp. Brugia malayi (strain TRS)	HTPG_WOLTR	-	-	2
gi|58584480	Q5GT63	1E-124	Superoxide dismutase (EC 1.15.1.1) - Wolbachia sp. subsp. Brugia malayi (strain TRS)	Q5GT63_WOLTR	-	-	2
gi|58585054	Q5GRI9	0.0	Type IV secretory pathway, VirB4 components - Wolbachia sp. subsp. Brugia malayi (strain TRS)	Q5GRI9_WOLTR	-	-	2
gi|58585052	Q5GRJ1	0.0	Type IV secretory pathway, VirB6 components - Wolbachia sp. subsp. Brugia malayi (strain TRS)	Q5GRJ1_WOLTR	-	-	2
gi|58584741	Q5GSF2	0.0	Predicted protein - Wolbachia sp. subsp. Brugia malayi (strain TRS)	Q5GSF2_WOLTR	1	-	3
gi|58584550	Q5GSZ3	1E-109	Deoxycytidine deaminase - Wolbachia sp. subsp. Brugia malayi (strain TRS)	Q5GSZ3_WOLTR	-	-	3
gi|58585000	Q5GRP3	6E-034	Predicted protein - Wolbachia sp. subsp. Brugia malayi (strain TRS)	Q5GRP3_WOLTR	-	-	4
gi|58584999	Q5GRP4	0.0	Probable extracellular metallopeptidase - Wolbachia sp. subsp. Brugia malayi (strain TRS)	Q5GRP4_WOLTR	-	-	4
gi|58584597	Q5GSU6	6E-051	Ribosomal protein L23 - Wolbachia sp. subsp. Brugia malayi (strain TRS)	Q5GSU6_WOLTR	-	-	6
gi|58584673	Q5GSM0	0.0	FAD synthase - Wolbachia sp. subsp. Brugia malayi (strain TRS)	Q5GSM0_WOLTR	-	-	7
gi|58584758	Q5GSD5	8E-050	Ribosomal protein S18 - Wolbachia sp. subsp. Brugia malayi (strain TRS)	Q5GSD5_WOLTR	-	-	35
gi|58585042	Q5GRK1	0.0	Chaperone protein dnaJ - Wolbachia sp. subsp. Brugia malayi (strain TRS)	DNAJ_WOLTR	1	1	-
gi|58584676	Q5GSL7	0.0	Zn-dependent peptidase - Wolbachia sp. subsp. Brugia malayi (strain TRS)	Q5GSL7_WOLTR	1	1	-
gi|58584438	Q5GTA5	1E-146	ABC-type phosphate transport system, ATPase component - Wolbachia sp. subsp. Brugia malayi (strain TRS)	Q5GTA5_WOLTR	1	-	-
gi|58584483	Q5GT60	0.0	Glucosamine 6-phosphate synthetase, contains amidotransferase and phosphosugar isomerase domains - Wolbachia sp. subsp. Brugia malayi (strain TRS)	Q5GT60_WOLTR	1	-	-
gi|58584536	Q5GT07	0.0	GTP cyclohydrolase II - Wolbachia sp. subsp. Brugia malayi (strain TRS)	Q5GT07_WOLTR	1	-	-
gi|58584862	Q5GS31	0.0	Leucyl-tRNA synthetase - Wolbachia sp. subsp. Brugia malayi (strain TRS)	Q5GS31_WOLTR	1	-	-
gi|58585047	Q5GRJ6	1E-111	Orotate phosphoribosyltransferase - Wolbachia sp. subsp. Brugia malayi (strain TRS)	Q5GRJ6_WOLTR	1	-	-
gi|58584689	Q5GSK4	1E-137	Outer surface protein Wsp - Wolbachia sp. subsp. Brugia malayi (strain TRS)	Q5GSK4_WOLTR	1	-	-
gi|58584354	Q5GTI9	1E-105	Peptidyl-tRNA hydrolase (EC 3.1.1.29) (PTH) - Wolbachia sp. subsp. Brugia malayi (strain TRS)	PTH_WOLTR	1	-	-
gi|58584941	Q5GRV2	0.0	Phosphoglycerate kinase (EC 2.7.2.3) - Wolbachia sp. subsp. Brugia malayi (strain TRS)	Q5GRV2_WOLTR	1	-	-
gi|58584722	Q5GSH1	0.0	Phosphoribosylamine-glycine ligase - Wolbachia sp. subsp. Brugia malayi (strain TRS)	Q5GSH1_WOLTR	1	-	-
gi|58584519	Q5GT24	3E-050	Predicted protein - Wolbachia sp. subsp. Brugia malayi (strain TRS)	Q5GT24_WOLTR	1	-	-
gi|58584296	Q5GTP7	4E-037	Predicted protein - Wolbachia sp. subsp. Brugia malayi (strain TRS)	Q5GTP7_WOLTR	1	-	-
gi|58584610	Q5GST3	0.0	Probable outer membrane protein - Wolbachia sp. subsp. Brugia malayi (strain TRS)	Q5GST3_WOLTR	1	-	-
gi|58584989	Q5GRQ4	0.0	Site-specific recombinase XerD - Wolbachia sp. subsp. Brugia malayi (strain TRS)	Q5GRQ4_WOLTR	1	-	-
gi|58584675	Q5GSL8	0.0	Zn-dependent peptidase - Wolbachia sp. subsp. Brugia malayi (strain TRS)	Q5GSL8_WOLTR	1	-	-
gi|58585051	Q5GRJ2	0.0	Type IV secretory pathway, VirB6 components - Wolbachia sp. subsp. Brugia malayi (strain TRS)	Q5GRJ2_WOLTR	2	1	-
gi|58584420	Q5GTC3	0.0	TRNA nucleotidyltransferase/poly(A) polymerase - Wolbachia sp. subsp. Brugia malayi (strain TRS)	Q5GTC3_WOLTR	2	-	-
gi|58584846	Q5GS47	1E-158	Formamidopyrimidine-DNA glycosylase (EC 3.2.2.23) (Fapy-DNA glycosylase) (DNA-(apurinic or apyrimidinic site) lyase mutM) (EC 4.2.99.18) (AP lyase mutM) - Wolbachia sp. subsp. Brugia malayi (strain TRS)	FPG_WOLTR	-	1	-
gi|58584692	Q5GSK1	1E-129	Glutathione S-transferase - Wolbachia sp. subsp. Brugia malayi (strain TRS)	Q5GSK1_WOLTR	-	1	-
gi|58584854	Q5GS39	0.0	Glycerol-3-phosphate dehydrogenase [NAD(P)+] (EC 1.1.1.94) (NAD(P)H-dependent glycerol-3-phosphate dehydrogenase) - Wolbachia sp. subsp. Brugia malayi (strain TRS)	GPDA_WOLTR	-	1	-
gi|58585038	Q5GRK5	1E-105	Predicted protein - Wolbachia sp. subsp. Brugia malayi (strain TRS)	Q5GRK5_WOLTR	-	1	-
gi|58584977	Q5GRR6	1E-164	Predicted protein - Wolbachia sp. subsp. Brugia malayi (strain TRS)	Q5GRR6_WOLTR	-	1	-
gi|58584833	Q5GS60	1E-067	Predicted protein - Wolbachia sp. subsp. Brugia malayi (strain TRS)	Q5GS60_WOLTR	-	1	-
gi|58584568	Q5GSX5	1E-137	Short-chain alcohol dehydrogenase family enzyme - Wolbachia sp. subsp. Brugia malayi (strain TRS)	Q5GSX5_WOLTR	-	1	-
gi|58584576	Q5GSW7	0.0	DNA-directed RNA polymerase alpha chain (EC 2.7.7.6) (RNAP alpha subunit) (Transcriptase alpha chain) (RNA polymerase subunit alpha) - Wolbachia sp. subsp. Brugia malayi (strain TRS)	RPOA_WOLTR	-	2	-
gi|58584298	Q5GTP5	0.0	Topoisomerase IA, TopA - Wolbachia sp. subsp. Brugia malayi (strain TRS)	Q5GTP5_WOLTR	-	4	-
